# Supplementary material for: Docking Studies on Potential Mechanisms for Decreasing Insulin Resistance by the Tangzhiqing Herbal Formula
Source: Hindawi journal article supplement (doi:10.1155/2020/1057648), 2020-01-01
Supplement: f1 [file 1057648.f1.pdf]

Tab 1. The plant origins and structures of typical compounds

| No. | Origin              | Compound           | Structure                                                                            |
|-----|---------------------|--------------------|--------------------------------------------------------------------------------------|
| 1   | Lotus leaf          | nuciferine         | 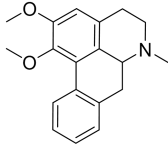  |
| 2   | mulberry leaf       | rutin              |    |
| 3   | mulberry leaf       | 1-deoxynorijimycin |    |
| 4   | Salvia miltiorrhiza | Salvianolic acid A |  |
| 5   | Salvia miltiorrhiza | Salvianolic acid B |  |
| 6   | Salvia miltiorrhiza | Salvianolic acid C |  |
| 7   | Salvia miltiorrhiza | Danshensu          |  |

|    |                        |                        |                                                                                      |
|----|------------------------|------------------------|--------------------------------------------------------------------------------------|
| 8  | Salvia<br>miltiorrhiza | Rosmarinic acid        | 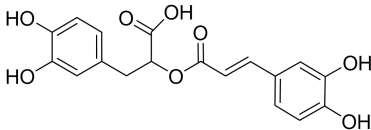   |
| 9  | Salvia<br>miltiorrhiza | Tanshinone IIA         |   |
| 10 | Salvia<br>miltiorrhiza | Cryptotanshinone       |   |
| 11 | Salvia<br>miltiorrhiza | Dihydrotanshinone<br>I |  |
| 12 | hawthorn leaf          | Quercitrin             |  |
| 13 | Paeoniae<br>Rubra      | paeoniflorin           |  |
